# Supplementary material for: Characterization of a Novel Polerovirus Infecting Maize in China
Source: PubMed Central journal article supplement (PMC4885075; doi:10.3390/v8050120), 2016-04-28
Supplement: viruses-08-00120-s001.pdf [file viruses-08-00120-s001.pdf]

# Supplementary Materials: Characterization of a Novel Polerovirus Infecting Maize in China

Sha Chen, Guangzhuang Jiang, Jianxiang Wu, Yong Liu, Yajuan Qian and Xueping Zhou

**Table S1.** Primers used in the article.

| Primer                                            | Sequence(5'→3')                       |
|---------------------------------------------------|---------------------------------------|
| used for clone MaYMV                              |                                       |
| F1                                                | GTACAAGATCTACCTATCTATCTCCTCG          |
| R1                                                | CGTCTACCTATCTCGGATTTTGAACA            |
| F2                                                | TGCTCACATGTCTTCGAGAAGGAA              |
| R2                                                | TCGGAGATGAACTCCAGTATGATCT             |
| vsi-F1                                            | AGGCCGCTACCGCCTCATCAT                 |
| vsi-F2                                            | CGATACGATGCAGAAGCTCT                  |
| vsi-R2                                            | TCGAACTGGTGTGTAGGAGCC                 |
| vsi-R3                                            | AGGTTGTCATCCTGTCTCGTT                 |
| Full-F                                            | TGACCTGCAGGTCGACACAAAAGGCACCCAAGGGA   |
| Full-R                                            | AGATGCCATGCCGACCCGGGACCAAGGATTCAGGGGA |
| used for mix-infection detection in field samples |                                       |
| MaYMV-F                                           | TGCTCACATGTCTTCGAGAAGGAA              |
| MaYMV-R                                           | TCGGAGATGAACTCCAGTATGATCT             |
| MCMV-F                                            | TCACCGATCCAGTAGCCATTGGAT              |
| MCMV-R                                            | TCAAGATGAACAGAATCGAGGAGATCA           |
| SCMV-F                                            | AGTGGCGCAACAAAGTGTGGATGT              |
| SCMV-R                                            | TCTCGGCTAGTGGTCTTGTGGT                |
| SRBSDV-F                                          | TGTCTGCACTTAGAAAAGGAGTCG              |
| SRBSDV-R                                          | TAGCTTTCTTAATTAGACGATCGCGA            |

**Table S2.** Sequences of selected members of the *Luteoviridae* used in the sequence analysis.

| Classification | Virus Name                         | Abbreviation | Accession No. |
|----------------|------------------------------------|--------------|---------------|
| Luteovirus     | Bean leafroll virus                | BLRV         | NC_003369     |
| Luteovirus     | Barley yellow dwarf virus-kerII    | BYDV-kerII   | NC_021481     |
| Luteovirus     | Barley yellow dwarf virus-kerIII   | BYDV-kerIII  | KC559092      |
| Luteovirus     | Barley yellow dwarf virus-MAV      | BYDV-MAV     | NC_003680     |
| Luteovirus     | Barley yellow dwarf virus-PAS      | BYDV-PAS     | NC_002160     |
| Luteovirus     | Barley yellow dwarf virus-PAV      | BYDV-PAV     | NC_004750     |
| Luteovirus     | Rose spring dwarf-associated virus | RSDaV        | NC_010806     |
| Luteovirus     | Soybean dwarf virus                | SbDV         | NC_003056     |
| Polerovirus    | Beet chlorosis virus               | BChV         | NC_002766     |
| Polerovirus    | Beet mild yellowing virus          | BMYV         | NC_003491     |
| Polerovirus    | Beet western yellows virus         | BWYV         | NC_004756     |
| Polerovirus    | Carrot red leaf virus              | CtRLV        | NC_006265     |
| Polerovirus    | Cereal yellow dwarf virus-RPS      | CYDV-RPS     | NC_002198     |
| Polerovirus    | Cereal yellow dwarf virus-RPV      | CYDV-RPV     | NC_004751     |
| Polerovirus    | Chickpea chlorotic stunt virus     | CpCSV        | NC_008249     |
| Polerovirus    | Cotton leafroll dwarf virus        | CLRdV        | NC_014545     |
| Polerovirus    | Cucurbit aphid-borne yellows virus | CABYV        | NC_003688     |
| Polerovirus    | Maize yellow dwarf virus-RMV       | MYDV-RMV     | NC_021484     |
| Polerovirus    | Melon aphid-borne yellows virus    | MABYV        | NC_010809     |
| Polerovirus    | Pepper vein yellows virus          | PeVYV        | NC_015050     |
| Polerovirus    | Potato leafroll virus              | PLRV         | NC_001747     |

Table S2. Cont.

| Classification     | Virus Name                       | Abbreviation | Accession No. |
|--------------------|----------------------------------|--------------|---------------|
| <i>Polerovirus</i> | Suakwa aphid-borne yellows virus | SABYV        | NC_018571     |
| <i>Polerovirus</i> | Sugarcane yellow leaf virus      | ScYLV        | NC_000874     |
| <i>Polerovirus</i> | Tobacco vein distorting virus    | TVDV         | NC_010732     |
| <i>Polerovirus</i> | Turnip yellows virus             | TuYV         | NC_003743     |
| <i>Enamovirus</i>  | Pea enation mosaic virus-1       | PEMV-1       | NC_003629     |

Table S3. Deep sequencing data and assembly of small RNAs.

|                                                          |                   |
|----------------------------------------------------------|-------------------|
| Clean reads                                              | 10,781,056        |
| Clean bases                                              | 240,323,048       |
| 18–28 nt reads                                           | 10,739,457(99.6%) |
| Total contigs after assembling small RNA                 | 536               |
| Contigs matching Barley yellow dwarf virus-RMV, BYDV-RMV | 5                 |
| Contigs matching Maize yellow dwarf virus-RMV, MYDV-RMV  | 5                 |

Table S4. Contigs found to have identity to Yellow dwarf viruses in a BLASTn search of the NCBI database.

|                               | Contig Name | Length | Identity      |
|-------------------------------|-------------|--------|---------------|
|                               | NODE_26     | 482    | 409/475 (86%) |
| Contigs Mapping               | NODE_38     | 179    | 133/153 (87%) |
| Maize yellow dwarf virus-RMV  | NODE_69     | 142    | 124/140 (89%) |
|                               | NODE_111    | 88     | 77/88 (88%)   |
|                               | NODE_199    | 85     | 77/83 (93%)   |
|                               | NODE_19     | 190    | 186/189 (98%) |
| Contigs Mapping               | NODE_41     | 194    | 185/194 (95%) |
| Barley yellow dwarf virus-RMV | NODE_155    | 72     | 66/69 (96%)   |
|                               | NODE_159    | 53     | 52/53 (98%)   |
|                               | NODE_231    | 85     | 81/82 (99%)   |
|                               | NODE_252    | 81     | 43/44 (98%)   |

NODE\_26

CCGAGAGTTACTCGAACTGGTGTGTAGGAGCCAGATTTCTGAACTCCCGCCACTCTCTGGGCG  
 AGCAGGGTCCCATCACTCAAGCACAAACACAGAGTTGGATATGCACTTCAACCAACACGCGCGT  
 AGGCGTCTGTGAGATCTGTGTGTGTGCGAGTGAGCCGGTTGCGGACTTCCATATCGTCTTGAAG  
 CATCCATTCCGCAACGCTCCAGTCAAAGCCAGAGCAGTCAGTCGGGACAGTGTGAAGCTGCCA  
 TTCTTGACAGTAAACGGTCCGCTGCTCACTCCACACTGTCTCGCGAGGTTTTGCACGAACTCTCGCG  
 ATTGGTCATCTGTTGAGAGACCAAACCGGGTTTCGAGGGTATGGCTCGCCAAAGTGCAATTC  
 CCTCTTGTGTTTATTCTGAAACAGAACCCGGGCTACCAGTTGATCCAGCAATGAGACGCTCATG  
 ATGAGGCGGTAGCGGCCTTCATCCAATTTGCTT

NODE\_38

TTGGGCTTTGATTGCCGCTCCGGTGTCTTTGGGCGTTTCATGGCTGATTCCGCAATTTGTTGA  
 ACAACCATCCGCTCTATAACTGAGACGTCGATCTTGTTGACCAACGCTTCCACCACCTTGTTGA  
 GAATATCGCTGTTTGAAGTAGCGACGGGCGAGACTGTAGGGGTGGGCGA

NODE\_69

AACCTGTGGGTCCCTCCCAAGGTACTACTTCACAAAACAGAAGGAAGAATCAGAATGGGGGAG  
GTTACTTGCAGAGGGAAACCCGGCGCTGGCAGAAAAAGTCAGCGGTTTCGGGTGGCCCCAGTT  
CGTCCCGCAGCCGAA

NODE\_111

AGAAACTGGGCAGATTATGAAGACGACATCTCATATGAAGCCCCAAAGTTTCAGGGAAACGAC  
GCACGCGGTTCCGTCCGCGGAAACA

NODE\_199

GGAAGACTGTGGAGGCATACAAAACCTTGTCAAACACAATGCCCAAGACTTCCCAAAGCAACC  
TGCTTGTCTGGGAGAATTTTCT

NODE\_19

GAGGATGGCGCATTGATCTTCTGATGAGTCGCGCCAAACTCCACCTCCGATTTGATTGGACGCA  
AAGACCCTCCTGCCACCTTTGACGATTGAGAATTTGTTAATGGTGGAGGCAAGGGATGAGAGCT  
TGTTGTGTGGATCAAGTTCATAAGCGATGGAACCTTCGGCGGTGGAAGCGGCCTCGGAGATT

NODE\_41

AAGACGAAGACGACCAAGTGGAAACACTGCAGGAAGACCTGGAGTCAGACGAGGCTCGCGGG  
AGACTTTTGTATTTCAAAGGACTCTCTACGGGCAATGCCTCCGGAAAAGTCACCTTCGGGCC  
GTCTTTATCAGAGTGTGCAGCATTAGTGGCGGAATTCTCAAGGCCTACCATGAGTATAAGATC  
TCAA

NODE\_155

ATTTGCCGCGACAACAACCACTGGCTGGGCCCGGTTATTATTGCGAGCGCGTCGGCGGTTCTTA  
GCTCTGCG

NODE\_159

ACCTATCTATCTCCTCGAACGTGCGTTCAATTGTGAATGAATACGGGAGGTAG

NODE\_231

TTCGGGTTTTGAACATTGACCTCAATCGTGATCCTGAAGGAACCCGCGACTGAGGACTTTCGGTT  
ACCTTTGTAGAGGATGGCGC

NODE\_252

GAGAACTCCATGAGCAGCTGCCCCGTCTACCTATCTCGGATTTTGAACATTGACCTCAATCGTG  
ATCCTGAAGGAACCCGC

**Table S5.** Percentages of nucleotide substitutions in MaYMV genome.

|   | Percentage of Nucleotide Substitution (%) |     |      |      |
|---|-------------------------------------------|-----|------|------|
|   | A                                         | T   | C    | G    |
| A | -                                         | 5.0 | 1.5  | 32.7 |
| T | -                                         | -   | 58.5 | 1.7  |
| C | -                                         | -   | -    | 0.6  |
| G | -                                         | -   | -    | -    |

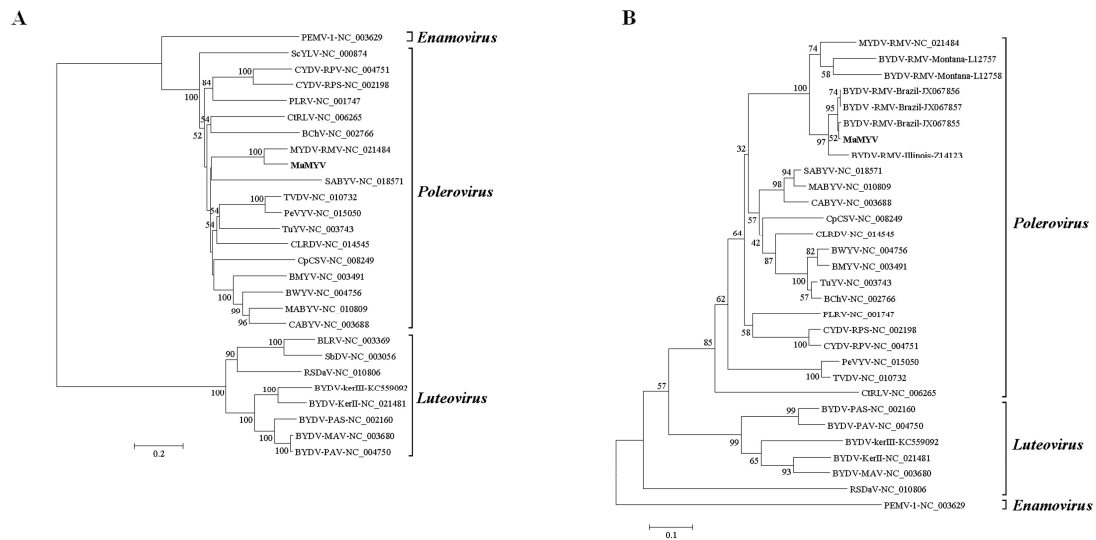

**Figure S1.** Phylogenetic analyses of MaYMV and selected luteoviruses based on amino acid sequences of RdRp (A) or CP (B). The phylogenetic trees were generated using the Neighbor-Joining method and MEGA6 software. The percentage of replicate trees in which the associated taxa clustered together in the bootstrap test (1000 replicates) is shown next to the branches.

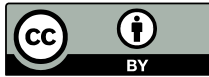

© 2016 by the authors; licensee MDPI, Basel, Switzerland. This article is an open access article distributed under the terms and conditions of the Creative Commons by Attribution (CC-BY) license (<http://creativecommons.org/licenses/by/4.0/>).
